# Supplementary material for: Interleukin‐23 Secreted by Activated Macrophages Drives γδT Cell Production of Interleukin‐17 to Aggravate Secondary Injury After Intracerebral Hemorrhage
Source: PubMed Central journal article supplement — J Am Heart Assoc. 2016 Oct 11;5(10):e004340. doi: 10.1161/JAHA.116.004340 (PMC5121525; doi:10.1161/jaha.116.004340), 2016-10-11
Supplement: JAH3-5-e004340-s001.pdf [file JAH3-5-e004340-s001.pdf]

# **Supplemental Material**

**Table S1.** Primers used for real-time PCR

| Gene                            | Primer                                                       | Product size (bp) |
|---------------------------------|--------------------------------------------------------------|-------------------|
| <b>IL-6</b>                     | sens: agttgccttcttgggactga<br>revs: tccacgattcccagagaac      | 159               |
| <b>IL-1<math>\beta</math></b>   | sens: gcccatcctctgtgactcat<br>revs: agctcatatgggtccgacag     | 129               |
| <b>TNF-<math>\alpha</math></b>  | sens: agaagttcccaaattggcctc<br>revs: ccacttggtggtttgctacg    | 120               |
| <b>IL-17</b>                    | sens: tcctctgtgatctgggaag<br>revs: ctcgaccctgaaagtgaagg      | 154               |
| <b>IL-23p19</b>                 | sens: tgctggattgcagagcagtaa<br>revs: gcatgcagagattccgagaga   | 121               |
| <b><math>\beta</math>-actin</b> | sens: agattactgctctggctcctagc<br>revs: actcatcgactcctgcttget | 147               |

**Table S2.** Primary and secondary antibodies used for immunofluorescence staining

| Antibodies                                           | Catalog No. | Dilution | Source     |
|------------------------------------------------------|-------------|----------|------------|
| <b>Mouse antimouse TLR2</b>                          | ab 119333   | 1:200    | Abcam      |
| <b>Rabbit antimouse TLR4</b>                         | ab 13556    | 1:200    | Abcam      |
| <b>Rat antimouse F4/80</b>                           | ab 6640     | 1:500    | Abcam      |
| <b>Rabbit antimouse IL-23P19</b>                     | ab 45420    | 1:100    | Abcam      |
| <b>Rabbit antimouse IL-17</b>                        | ab 79056    | 1:100    | Abcam      |
| <b>Rat antimouse CD3</b>                             | ab 33429    | 1:100    | Abcam      |
| <b>Rat antimouse TLR2</b>                            | ab 11864    | 1:200    | Abcam      |
| <b>Mouse antimouse <math>\beta</math>III tubulin</b> | ab 78078    | 1:200    | Abcam      |
| <b>Rabbit antirat IgG Alexa Fluor 488</b>            | A21210      | 1:500    | Invitrogen |
| <b>Goat antirabbit IgG Alexa Fluor 568</b>           | A11011      | 1:500    | Invitrogen |
| <b>Goat antimouse IgG Alexa Fluor 647</b>            | A21236      | 1:500    | Invitrogen |

**Table S3.** Physiological parameters of mice before and after ICH

| Parameter                                              | Treatment group | Pre-ICH   | 1 days post-ICH | 4 days post-ICH | 7 days post-ICH |
|--------------------------------------------------------|-----------------|-----------|-----------------|-----------------|-----------------|
| <b>Temperature (°C)</b>                                | ICH+vehicle     | 36.9±0.2  | 37.1±0.2        | 37.2±0.5        | 36.9±0.4        |
|                                                        | ICH+SsnB        | 37.0±0.4  | 36.9±0.3        | 37.0±1.0        | 37.1±0.7        |
| <b>Peripheral white cell count (×10<sup>9</sup>/L)</b> | ICH+vehicle     | 7.46±2.25 | 7.63±3.03       | 7.68±3.62       | 7.61±3.13       |
|                                                        | ICH+SsnB        | 7.39±2.31 | 7.52±1.78       | 7.74±2.16       | 7.41±3.06       |

Figure S1.

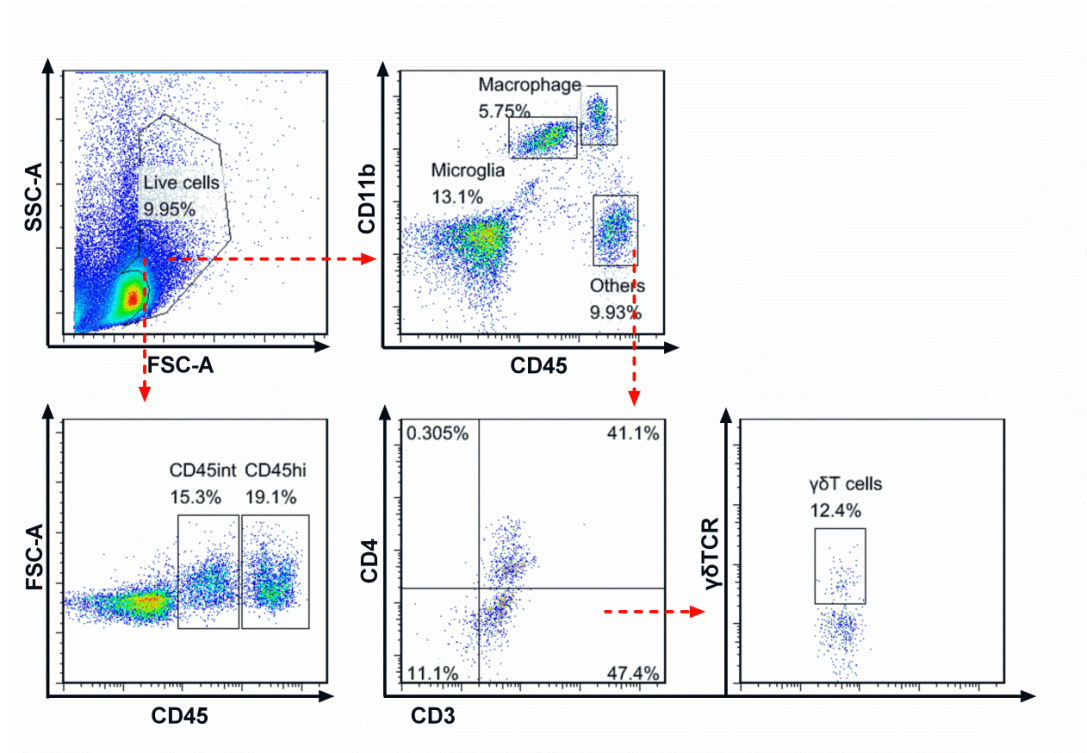

Figure S2.

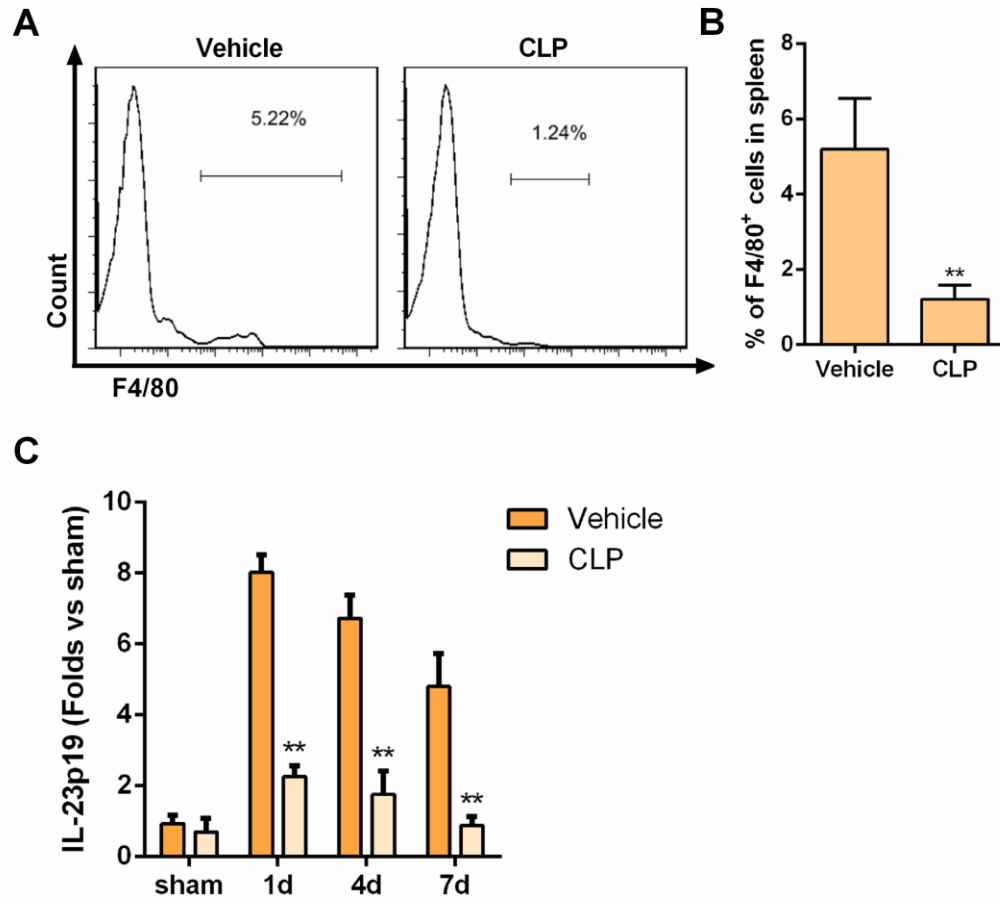

Figure S3.

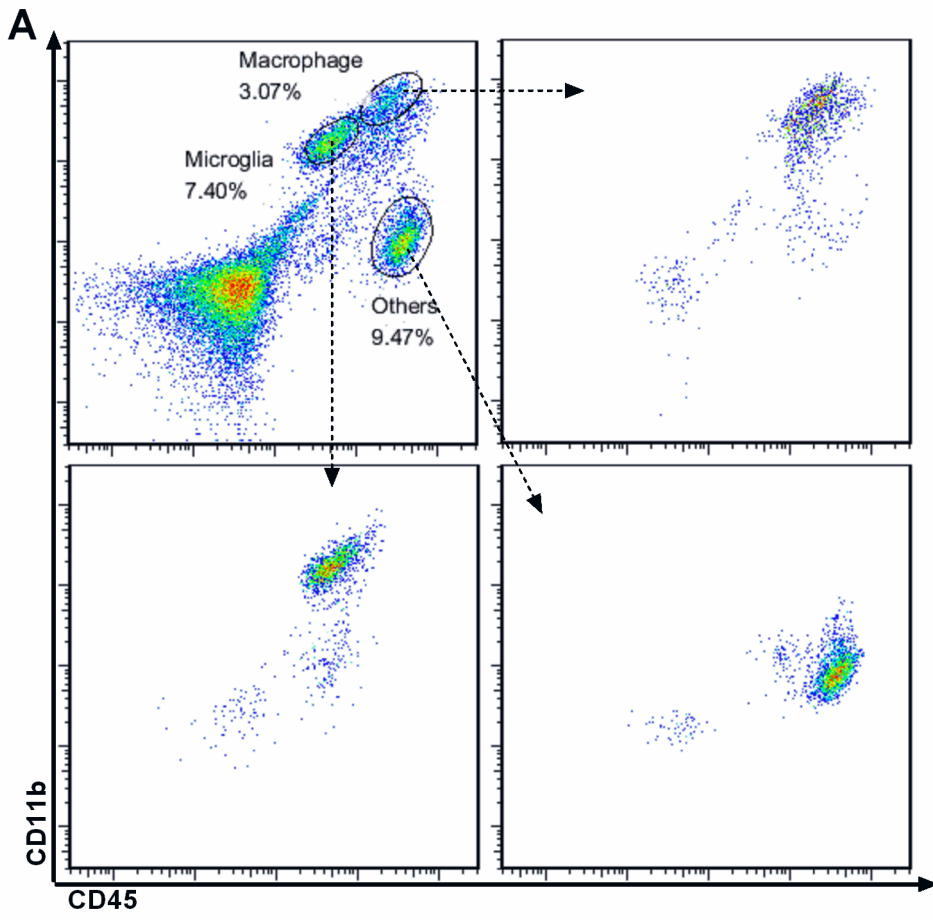

Figure S4.

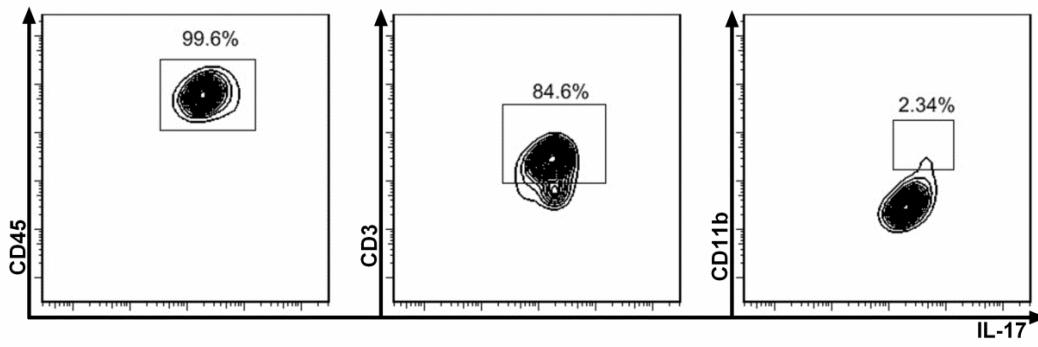

**Figure S5.**

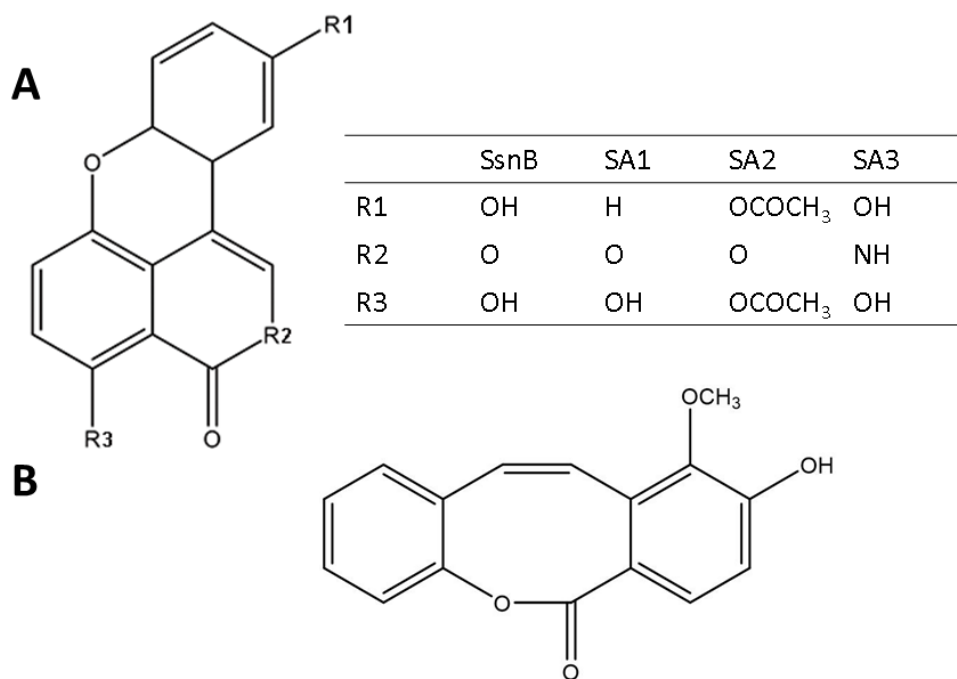

**Figure S6.**

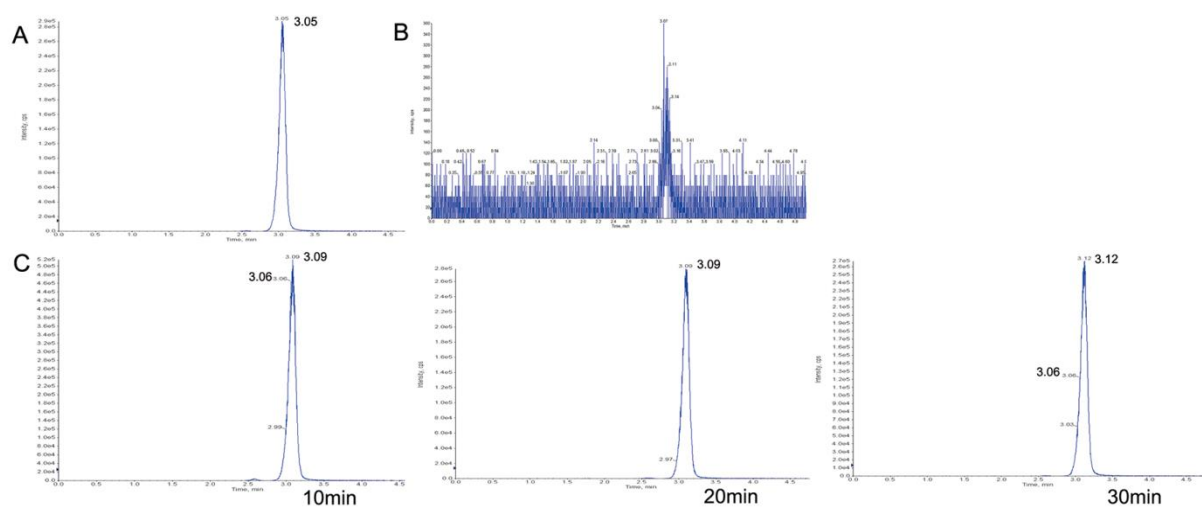



### Supplemental Figure Legends:

**Figure S1.** Macrophages, microglia, and other cell types were identified by FACS from pooled infiltrating inflammatory cells collected from 8 mice on day 4 after induction of ICH, according to the following markers: CD45<sup>high</sup>CD11b<sup>high</sup> cell were macrophages; CD45<sup>int</sup>CD11b<sup>int</sup> were microglia; CD45<sup>high</sup>CD3<sup>+</sup>CD4<sup>+</sup> cells were defined as brain-invading T helper cells; and CD45<sup>high</sup>CD3<sup>+</sup> cells were further analyzed to identify  $\gamma\delta$ T lymphocytes. FSC-A, forward scatter channel area; SSC-A, side scatter channel area.

**Figure S2.** Depletion of macrophages in the spleen upon clodronate liposome (CLP) treatment. (A) Percentages of F4/80<sup>+</sup> macrophages in spleens of vehicle-treated and CLP-treated mice at 1 day after ICH determined by flow cytometric analysis. (B) Quantified percentages of F4/80<sup>+</sup> macrophages in spleens of vehicle-treated and CLP-treated groups. (\*\*p<0.01 vs. vehicle, n=5). (C) mRNA expression of IL-23p19 in perihematoma tissues at 1, 4, and 7 days after ICH in the CLP- and vehicle-treated mice. (\*\*p<0.01 vs. vehicle, n=4).

**Figure S3.** Sorting of macrophages, microglia, and other cells from pooled infiltrating inflammatory cells collected from 7 mice at day 4 by FACS for subsequent evaluation of IL-23p19 expression. CD45<sup>high</sup>CD11b<sup>high</sup> cell were macrophages; CD45<sup>int</sup>CD11b<sup>int</sup> were microglia; and CD45<sup>+</sup>, CD11b<sup>-</sup> were grouped as “other” cells.

**Figure S4.** CD3<sup>+</sup> T lymphocytes were the main source of IL-17. The indicated surface markers were used to identify IL-17-producing cells among pooled infiltrating inflammatory cells collected from 8 mice on day 4 after induction of ICH and sorted by FACS.

**Figure S5.** (A) Structures of SsnB and the compounds derived from SsnB. (B) Structure of J1, the isomeric isomer of SsnB.

**Figure S6.** SsnB crosses the mouse blood-brain barrier. (A) Standard curve for SsnB. (B) SsnB concentrations in cerebral tissues of mice subjected to ICH and in the vehicle-treated group. (C) SsnB concentrations in cerebral tissues of ICH model mice at 10, 20, and 30 minutes after intravenous injection of SsnB.
